# Supplementary material
Source: Springer Nature journal article supplement (https://www.springermedizin.de/resource/supplementary/13046_2012_562_MOESM4_ESM.pdf/9662454)

# All patients

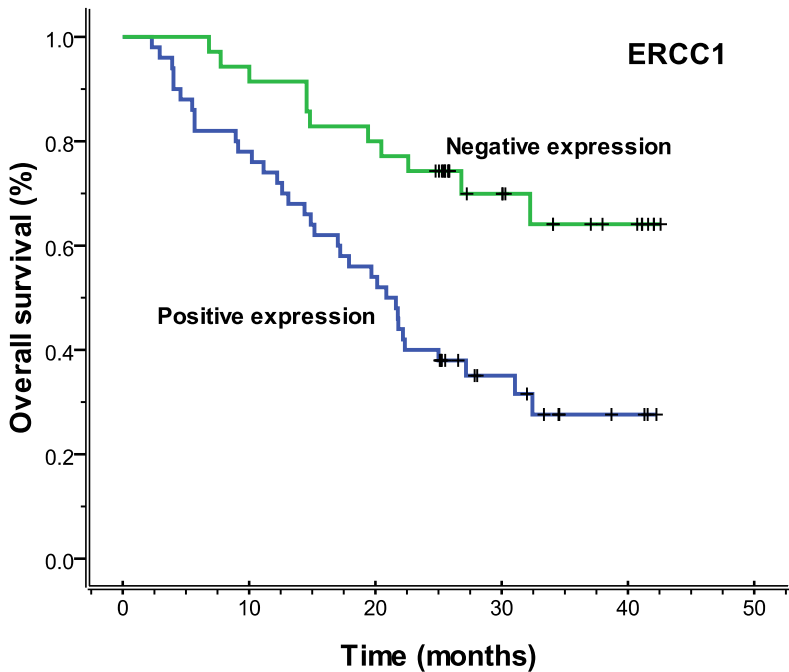

Supplement: MOESM4 [file 9662454]
